# Supplementary material
Source: PubMed Central journal article supplement (PMC3055699)
Supplement: 97320630005244S1.pdf [file 97320630005244S1.pdf]

### Supplementary material:

**Table 1:** PDB accession numbers of hemagglutinin structures for each influenza A subtype used in this study.

| Subtype | PDB ID | Isolate |
|---------|--------|---------|
| H1N1    | 3HTT   | Duck    |
|         | 1RD8   | Human   |
| H3N3    | 1MQN   | Duck    |
|         | 1HGF   | Human   |
| H5N1    | 1JSN   | Human   |
|         | 2FK0   | Human   |

**Table 2:** The threshold values for similarity determination of 3D structures, based on the Root Mean Square Deviation (RMSD) score.

| RMSD (Å) | Structural Relationship       |
|----------|-------------------------------|
| >12      | Completely unrelated          |
| 7        | Dubious relationship          |
| 5        | May be structurally related   |
| 4        | Good structural relationship  |
| 2        | Closely related               |
| 1.5      | Very closely related          |
| 0.8      | Differences are not obvious   |
| 0.4      | Essentially indistinguishable |
